# Supplementary material for: Microbiological, clinical and molecular findings of non-typhoidal Salmonella bloodstream infections associated with malaria, Oriental Province, Democratic Republic of the Congo
Source: PubMed Central journal article supplement (PMC4902913; doi:10.1186/s12879-016-1604-1), 2016-06-10

**Figure S1.** Minimum-spanning tree analysis of MLVA (multiple-locus variable-number tandem-repeats analysis) data of 54 *Salmonella* Typhimurium isolates from the Oriental Province, DRC, 2009-2014. Each circle displays a unique MLVA type, with different colours indicating the year of collection of isolates.

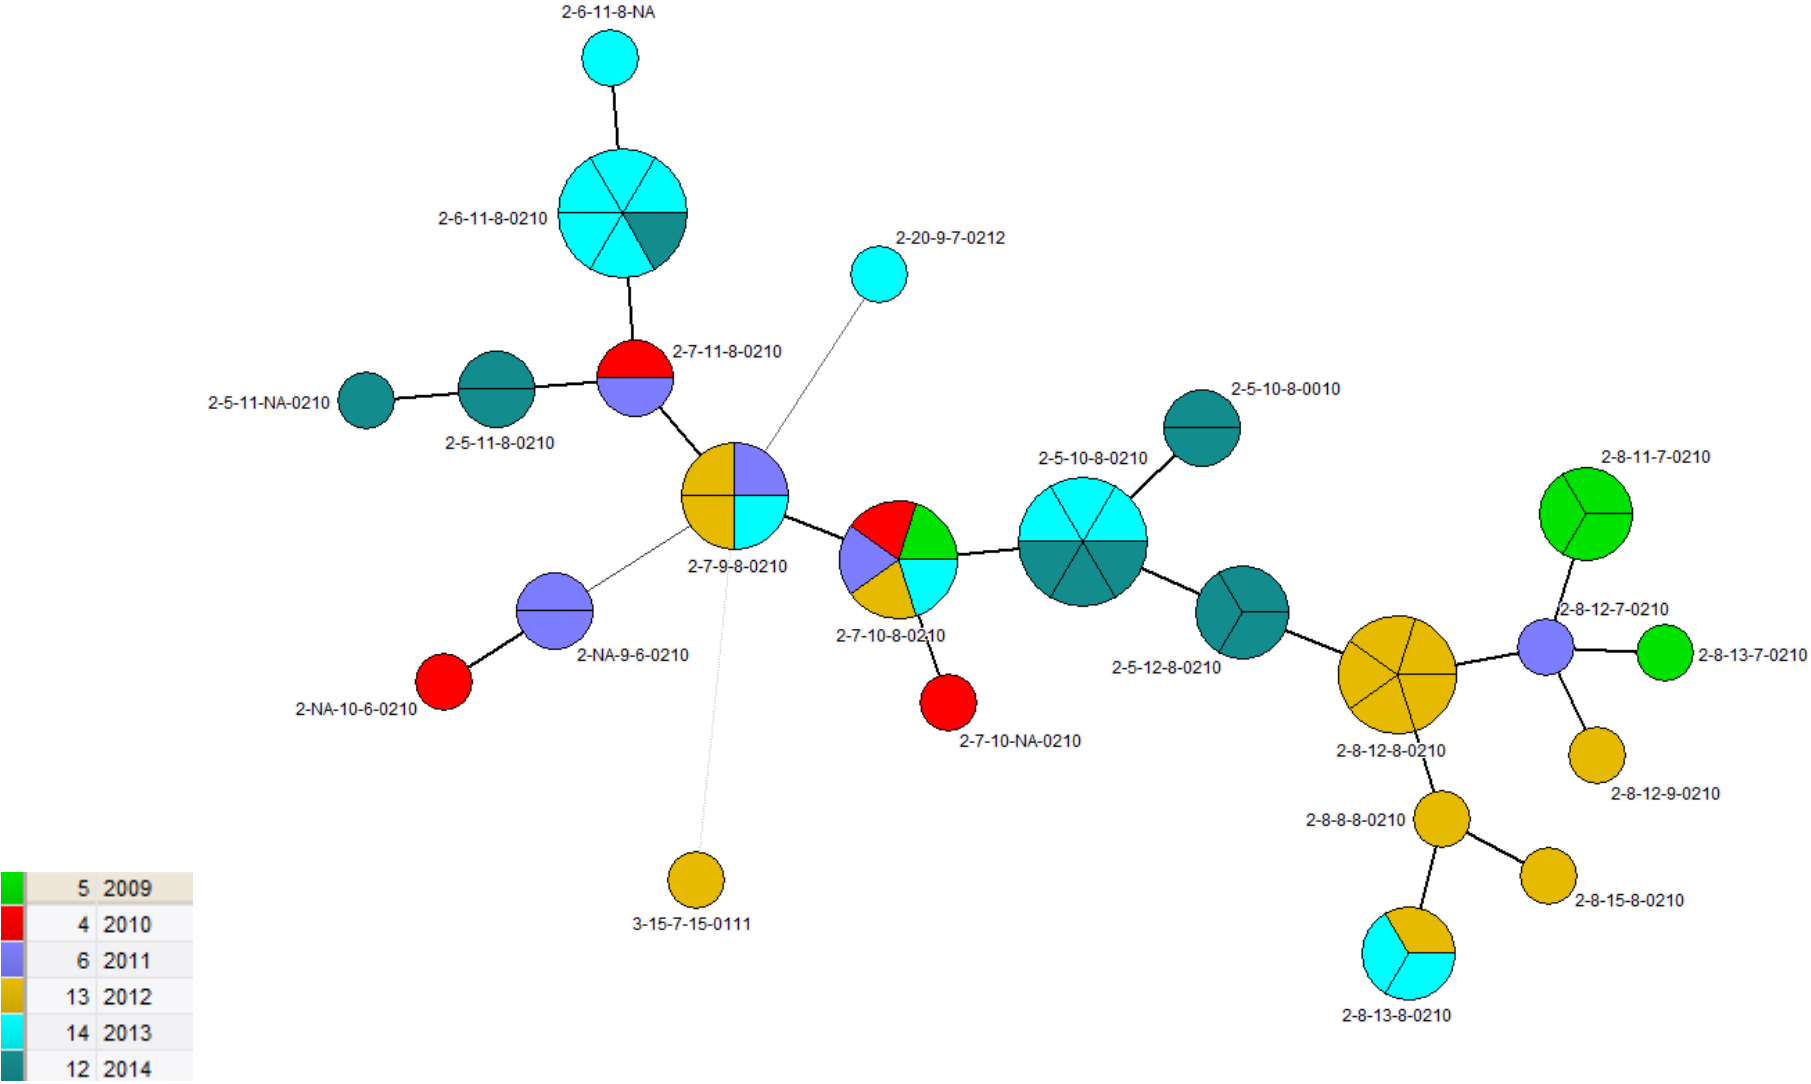

Supplement: 12879_2016_1604_MOESM1_ESM.pdf [file 12879_2016_1604_MOESM1_ESM.pdf]
